# A Comprehensive Head-to-Head Comparison of Key Plasma Phosphorylated Tau 217 Biomarker Tests

Noëlle Warmenhoven<sup>1#</sup>, Gemma Salvadó<sup>1</sup>, Shorena Janelidze<sup>1</sup>, Niklas Mattsson-Carlgren<sup>1-3</sup>, Divya Bali<sup>1</sup>, Anna Orduña Dolado<sup>1</sup>, Hartmuth Kolb<sup>4</sup>, Gallen Triana-Baltzer<sup>4</sup>, Nicolas R. Barthélemy<sup>5,6</sup>, Suzanne E. Schindler<sup>6,7,8</sup>, Andrew J. Aschenbrenner<sup>6</sup>, Cyrus A. Raji<sup>7,9</sup>, Tammie L.S. Benzinger<sup>7,9</sup>, John C. Morris<sup>6,7</sup>, Laura Ibanez<sup>10,11</sup>, Jigyasha Timsina<sup>10,11</sup>, Carlos Cruchaga<sup>10,11</sup>, Randall J. Bateman<sup>5-8</sup>, Nicholas Ashton<sup>12</sup>, Burak Arslan<sup>12</sup>, Henrik Zetterberg<sup>12, 16-20</sup>, Kaj Blennow<sup>12,16</sup>, Alexa Pichet Binette<sup>1</sup> & Oskar Hansson<sup>1,21#</sup>

## Abstract

Plasma phosphorylated-tau 217 (p-tau217) is currently the most promising biomarkers for reliable detection of Alzheimer's disease (AD) pathology. Various p-tau217 assays have been developed, but their relative performance is unclear. We compared key plasma p-tau217 tests using cross-sectional and longitudinal measures of amyloid- $\beta$  (A $\beta$ )-PET, tau-PET, and cognition as outcomes, and benchmarked them against cerebrospinal fluid (CSF) biomarker tests.

Samples from 998 individuals (mean[range] age 68.5[20.0-92.5], 53% female) from the Swedish BioFINDER-2 cohort were analyzed. Plasma p-tau217 was measured with mass spectrometry (MS) assays (the ratio between phosphorylated and non-phosphorylated [%p-tau217<sub>WashU</sub>] and p-tau217<sub>WashU</sub>) as well as with immunoassays (p-tau217<sub>Lilly</sub>, p-tau217<sub>Janssen</sub>, p-tau217<sub>ALZpath</sub>). CSF biomarkers included p-tau217<sub>Lilly</sub>, and the FDA-approved p-tau181/A $\beta$ 42<sub>Elecsys</sub> and p-tau181<sub>Elecsys</sub>.

All plasma p-tau217 tests exhibited high ability to detect abnormal A $\beta$ -PET (AUC range: 0.91-0.96) and tau-PET (AUC range: 0.94-0.97). Plasma %p-tau217<sub>WashU</sub> had the highest performance, with significantly higher AUCs than all the immunoassays ( $P_{diff}<0.007$ ). For detecting A $\beta$ -PET status, %p-tau217<sub>WashU</sub> had an accuracy of 0.93 (immunoassays: 0.83-0.88), sensitivity of 91% (immunoassays: 84-87%), and a specificity of 94% (immunoassays: 85-89%). Among immunoassays, p-tau217<sub>Lilly</sub> and plasma p-tau217<sub>ALZpath</sub> had higher AUCs than plasma p-tau217<sub>Janssen</sub> for A $\beta$ -PET status ( $P_{diff}<0.006$ ), and p-tau217<sub>Lilly</sub> outperformed plasma p-tau217<sub>ALZpath</sub> for tau-PET status ( $P_{diff}=0.025$ ). Plasma %p-tau217<sub>WashU</sub> exhibited higher

associations with all PET load outcomes compared to immunoassays; baseline A $\beta$ -PET load ( $R^2$ : 0.72; immunoassays: 0.47-0.58;  $P_{\text{diff}} < 0.001$ ), baseline tau-PET load ( $R^2$ : 0.51; immunoassays: 0.38-0.45;  $P_{\text{diff}} < 0.001$ ), longitudinal A $\beta$ -PET load ( $R^2$ : 0.53; immunoassays: 0.31-0.38;  $P_{\text{diff}} < 0.001$ ) and longitudinal tau-PET load ( $R^2$ : 0.50; immunoassays: 0.35-0.43;  $P_{\text{diff}} < 0.014$ ). Among immunoassays, plasma p-tau217<sub>Lilly</sub> was more strongly associated with A $\beta$ -PET load than plasma p-tau217<sub>Janssen</sub> ( $P_{\text{diff}} < 0.020$ ) and with tau-PET load than both plasma p-tau217<sub>Janssen</sub> and plasma p-tau217<sub>ALZpath</sub> (all  $P_{\text{diff}} < 0.010$ ). Plasma %p-tau217 also correlated more strongly with baseline cognition (Mini-Mental State Examination[MMSE]) than all immunoassays ( $R^2$  %p-tau217<sub>WashU</sub>: 0.33; immunoassays: 0.27-0.30;  $P_{\text{diff}} < 0.024$ ). The main results were replicated in an external cohort from Washington University in St Louis ( $n = 219$ ). Finally, p-tau217<sub>Nulisa</sub> showed similar performance to other immunoassays in subsets of both cohorts.

In summary, both MS- and immunoassay-based p-tau217 tests generally perform well in identifying A $\beta$ -PET, tau-PET, and cognitive abnormalities, but %p-tau217<sub>WashU</sub> performed significantly better than all the examined immunoassays. Plasma %p-tau217 may be considered as a stand-alone confirmatory test for AD pathology, while some immunoassays might be better suited as triage tests where positive results are confirmed with a second test.

### Author affiliations:

1. Clinical Memory Research Unit, Department of Clinical Sciences Malmö, Lund University, Lund, Sweden.
2. Department of Neurology, Skåne University Hospital, Lund University, Lund, Sweden.
3. Wallenberg Center for Molecular Medicine, Lund University, Lund, Sweden.
4. Neuroscience Biomarkers, Johnson and Johnson Innovative Medicine, San Diego, CA, USA.
5. The Tracy Family SILQ Center, Washington University School of Medicine, St. Louis, MO, USA.
6. Department of Neurology, Washington University School of Medicine, St. Louis, MO, USA.
7. Knight Alzheimer Disease Research Center, Washington University School of Medicine, St. Louis, MO, USA.

8. Hope Center for Neurological Disorders, Washington University School of Medicine, St. Louis, MO, USA.
9. Department of Radiology, Washington University School of Medicine, St. Louis, MO, USA.
10. Department of Psychiatry, Washington University, St. Louis, MO, USA.
11. Hope Center Program on Protein Aggregation and Neurodegeneration, Washington University St. Louis, MO, USA.
12. Department of Psychiatry and Neurochemistry, Institute of Neuroscience and Physiology, the Sahlgrenska Academy at the University of Gothenburg, Mölndal, Sweden
13. King's College London, Institute of Psychiatry, Psychology and Neuroscience Maurice Wohl Institute Clinical Neuroscience Institute, London, United Kingdom
14. NIHR Biomedical Research Centre for Mental Health and Biomedical Research Unit for Dementia at South London and Maudsley NHS Foundation, London, United Kingdom
15. Centre for Age-Related Medicine, Stavanger University Hospital, Stavanger, Norway
16. Clinical Neurochemistry Laboratory, Sahlgrenska University Hospital, Mölndal, Sweden
17. Department of Neurodegenerative Disease, UCL Institute of Neurology, Queen Square, London, UK
18. UK Dementia Research Institute at UCL, London, UK
19. Hong Kong Center for Neurodegenerative Diseases, Clear Water Bay, Hong Kong, China
20. Wisconsin Alzheimer's Disease Research Center, University of Wisconsin School of Medicine and Public Health, University of Wisconsin-Madison, Madison, WI, USA
21. Memory Clinic, Skåne University Hospital, Lund University, Lund, Sweden.

#Correspondence to:

Oskar Hansson, MD, PhD,

Memory Clinic,

Skåne University Hospital, SE-205 02 Malmö, Sweden

E-mail: [oskar.hansson@med.lu.se](mailto:oskar.hansson@med.lu.se)

Noëlle Warmenhoven, MSc

Clinical Memory Research Unit, Department of Clinical Sciences Malmö,

Lund University, Klinikgatan 28, SE-222 42 Lund, Sweden

E-mail: noelle.warmenhoven@med.lu.se

**Running title:** Comparing Plasma Phospho-Tau 217 Biomarkers

**Keywords:** Alzheimer's disease / plasma biomarkers / p-tau217 / CSF biomarkers

## Introduction

Detection of Alzheimer's disease (AD) pathology, i.e., amyloid- $\beta$  (A $\beta$ ) plaques and hyperphosphorylated tau aggregates, with accurate blood tests is of high interest both for research and clinical trials, and clinical implementation is already underway.<sup>1-3</sup> For optimal clinical management of AD, it is crucial to ensure a timely and accurate diagnosis in a scalable and cost-effective manner. This is becoming even more important with the launch of disease-modifying therapies in several countries.<sup>1,4,5</sup> Tau phosphorylated at threonine 217 (p-tau217) has emerged as a leading plasma biomarker of AD pathology along the disease continuum ranging from pre-symptomatic to symptomatic disease stages.<sup>1,3,6-10</sup> Several p-tau217 assays have been developed using a variety of methods. The performance of these different assays may differ depending on analytical factors (e.g., the specific antibodies used), or the measurement techniques (e.g., mass spectrometry [MS] versus immunoassays). A comparison of the different assays is needed to determine to what extent different assays provide an alternative to established cerebrospinal fluid (CSF) and imaging markers. Previously, we showed that MS-based measures of p-tau217 performed the best out of a variety of p-tau217 and p-tau181 plasma assays to predict CSF A $\beta$ -status in 135 individuals with mild cognitive impairment (MCI).<sup>8</sup> It has also been shown that several p-tau217 immunoassays perform similarly when predicting A $\beta$ -status.<sup>11-14</sup> Nonetheless, it is not yet clear whether different p-tau217 assays perform similarly in relation to other key measures of AD, such as cross-sectional and longitudinal measures of A $\beta$ -PET load, tau-PET load, and cognition, and how they compare to well-established CSF markers in these contexts. Further, it is important to determine which plasma p-tau217 tests fulfill the proposed minimal requirements for use in clinical practice either as i) a stand-alone confirmatory test, or ii) as a triage test where positive or intermediate results are confirmed with a higher performing test such as CSF or PET.<sup>15</sup>

To this end, we conducted a head-to-head study comparing the performance and accuracy of four different plasma p-tau217 assays, using both high-performing MS- and immunoassay-based tests in a large Swedish sample covering the full spectrum of AD ( $n = 998$ ) with sensitivity analyses performed in cognitively unimpaired (CU) and cognitively impaired (CI) individuals separately. The blood tests were compared in their abilities to discriminate normal versus abnormal A $\beta$ - and tau-PET status, and for continuous associations with baseline levels and the rate of change in A $\beta$ - and tau-PET values, and cognitive test scores. Plasma biomarker performances were also compared to relevant CSF tests, i.e., the FDA-approved p-tau181/A $\beta$ 42 ratio and p-tau181 tests, and p-tau217. Finally, the results were replicated using plasma biomarkers in an external American cohort ( $n = 219$ ). We hypothesized that the best plasma p-tau217 tests would be on par with the CSF tests, supporting a possible substitution of CSF tests with plasma biomarkers for AD.

## Materials and methods

### Participants

#### BioFINDER-2 cohort

The study population consisted of participants from the prospective Swedish BioFINDER-2 study (NCT03174938), recruited between 2017-2022, from the Skåne University Hospital and Ängelholm Hospital. Participants were either cognitively normal ( $n = 375$ ), had subjective cognitive decline (SCD) ( $n = 139$ ), mild cognitive impairment (MCI) ( $n = 256$ ), or dementia due to AD ( $n = 131$ ), or due to other causes (frontotemporal dementia, dementia with Lewy bodies, Parkinson's disease dementia, vascular dementia or unspecified dementia) ( $n = 97$ ). Overall exclusion criteria included: i) presence of systemic illness preventing study participation; ii) significant neurological or psychiatric diseases; iii) current alcohol or substance abuse; iv) unwilling to undergo imaging or lumbar puncture. All participants were required to be proficient in Swedish. Cognitively normal and SCD participants formed the group of CU individuals ( $n =$

514). The inclusion criteria here included not meeting MCI or dementia criteria (for further details see Salvadó et al., 2024). Participants with MCI exhibited significant cognitive decline on at least one domain from a neuropsychological test battery, defined as performing below 1.5 standard deviation below the normative score.<sup>16</sup> AD dementia was diagnosed based on DSM-5 criteria and further confirmed with A $\beta$  biomarkers based on the NIA-AA criteria for AD.<sup>17</sup> Patients with MCI or dementia formed the group of CI individuals ( $n = 484$ ). For this study, participants were only included if they had all plasma and CSF biomarkers available at baseline ( $n = 998$ ).<sup>18,19</sup> The BioFINDER-2 study was approved by the Swedish Ethical Review Authority. Each participant and/or their relatives provided informed consent. The study adhered to guidelines outlined in the WMA Declaration of Helsinki and the Department of Health and Human Services Belmont Report.

### **Knight ADRC cohort**

The Knight ADRC cohort is composed of community-dwelling volunteers enrolled in aging studies in Washington University in St. Louis. All participants underwent comprehensive clinical assessments including neurological examinations and cognitive testing and were included if they had all fluid biomarkers available ( $n = 219$ ).<sup>20</sup> Participants with a Clinical Dementia Rating (CDR)=0 were classified as cognitively unimpaired ( $n = 195$ ) and those with a CDR>0 were classified as cognitively impaired ( $n = 27$ ).<sup>21</sup> All participants gave written informed consent and ethical approval was granted by the Washington University Human Research Protection Office (protocol: 201109100).

### **Plasma biomarkers**

Blood was collected in K2-EDTA-plasma tubes and centrifuged at 2000g, +4°C for 10 minutes. Plasma was aliquoted into 1.5-ml polypropylene tubes (1 ml per tube) and stored at -80°C. Plasma %p-tau217<sub>WashU</sub> and plasma p-tau217<sub>WashU</sub> were derived from non-phosphorylated tau217 and p-tau217 concentrations were measured with a liquid chromatography tandem high-resolution mass spectrometry (LC-MS/HRMS) method developed at Washington University (WashU).<sup>7,22</sup> The plasma %p-tau217<sub>WashU</sub> was determined by dividing the level of tau phosphorylated at residue 217 by the concentration of the non-phosphorylated version of the same tau peptide. Plasma p-tau217<sub>Lilly</sub> concentrations were measured with the Meso Scale

Discovery immunoassay developed by Lilly Research Laboratories.<sup>23-25</sup> Plasma p-tau217<sub>Janssen</sub> concentrations were measured using a Single molecule arrays (Simoa) immunoassay developed by Johnson & Johnson Innovative Medicine, formerly Janssen R&D<sup>12,26,27</sup>, which is commercially available at Quanterix as LucentAD p217 assay. Plasma p-tau217<sub>ALZpath</sub> was measured with the ALZpath pTau217 assay and is commercially available.<sup>28</sup> More detailed descriptions regarding the assays can be found in Supplementary materials. In the Knight ADRC cohort, plasma biomarkers were measured with the same assays as in BioFINDER-2, except that the Janssen and ALZpath assays were not available. For a subset of participants, measurements with the multiplex NULISA pTau-217 Assay (p-tau217<sub>NULISA</sub>)<sup>29</sup> were available in BioFINDER-2 ( $n = 463$ ) and the Knight ADRC cohort ( $n = 97$ ).

## CSF biomarkers

CSF was obtained through lumbar puncture during the same session as blood collection and stored at  $-80^{\circ}\text{C}$  polypropylene tubes. Samples were handled in agreement with the suggested protocol.<sup>30</sup> CSF p-tau217<sub>Lilly</sub> concentrations were measured with the Meso Scale Discovery immunoassay developed by Lilly Research Laboratories. CSF p-tau181, A $\beta$ 40 and A $\beta$ 42 concentrations were measured with the Roche Elecsys CSF immunoassays on a fully automated Cobas instruments (Roche Diagnostics International Ltd., Rotkreuz, Switzerland).<sup>31</sup> The ratio between CSF p-tau181 and A $\beta$ 42 (CSFp-tau181/A $\beta$ 42) is approved by the FDA to detect Alzheimer's pathology in cognitively impaired individuals. Participants were categorized as being CSF A $\beta$ -positive based on a CSF A $\beta$ 42/A $\beta$ 40 threshold below 0.075, determined with Gaussian mixture modelling (GMM).<sup>24,32</sup> In the Knight ADRC cohort, CSF was collected at the same time as blood draw. CSF A $\beta$ 42, A $\beta$ 40 and p-tau181 were measured with the Lumipulse G1200 automated immunoassay platform (Fujirebio). The A $\beta$ 42/40 ratio from Lumipulse is also FDA-approved.

## PET

PET scans were performed at Skåne University Hospital in Lund, Sweden. A $\beta$ -PET images were acquired 90-110 min after the injection of  $\sim 185$  MBq [ $^{18}\text{F}$ ]flutemetamol in participants without dementia ( $n = 698$ ). The standardized uptake value ratios (SUVR) were created with the whole

cerebellum as reference region. A $\beta$ -PET positivity was defined as having a SUVR in the neocortical meta region of interest (ROI) of  $\geq 1.033$ , defined through GMM.<sup>33</sup> A subset of participants ( $n = 448$ ) underwent A $\beta$ -PET longitudinally for an average follow-up of  $3.63 \pm 2.30$  years. Almost all participants ( $n = 961$ ) had tau-PET data available. Images were acquired 70-90 min post injection of  $\sim 370$  MBq of [ $^{18}\text{F}$ ]RO948. Tau-PET positivity was characterized as  $\geq 1.362$  SUVR in the temporal-meta ROI with the inferior cerebellar cortex as reference region.<sup>34,35</sup> A subset of participants ( $n = 524$ ) had follow-up tau-PET data available over the course of  $3.46 \pm 2.09$  years. Further details have been described elsewhere.<sup>24,36</sup> The Swedish Medical Products Agency and the local Radiation Safety Committee at Skåne University Hospital, Sweden, approved the PET imaging. In the Knight ADRC cohort, PET-scans were obtained within one year of plasma and CSF collection. A $\beta$ -PET was performed with either tracer [ $^{18}\text{F}$ ]florbetapir (AV45) or [ $^{11}\text{C}$ ]Pittsburgh Compound B (PiB).<sup>20</sup> The mean cortical SUVR was calculated based on the averaged signal of neocortical ROIs using cerebellar gray matter as the reference regions. Centiloids were derived from SUVR values and a cutoff of  $\geq 37$  Centiloids was defined for A $\beta$ -PET positivity.<sup>37</sup>

## Cognition

We focused on two cognitive measures. First, we included the MMSE<sup>38</sup>, which measured global cognitive function, with a range of zero to thirty, in which zero is the worst possible score. Second, we included a modified version of the Preclinical Alzheimer Cognitive Composite (mPACC), which measures different aspects of cognition associated with early stages of cognitive decline, in which lower scores indicate more cognitive impairment. The mPACC included z-scores on animal fluency, MMSE, Symbol Digit Modalities Test and Alzheimer's Disease Assessment Scale delayed recall scores (counted twice).<sup>39</sup> Dementia patients were excluded from mPACC analyses ( $n = 228$ ). In the Knight ADRC cohort, we used a global cognitive composite as previously described.<sup>40</sup>

## Statistical analyses

Statistical analyses were carried out in R (version 4.3.2). Fluid biomarkers were  $\log_{10}$ -transformed (except p-tau217<sub>NULISA</sub>) and z-scored using CU A $\beta$ - individuals as reference group.



Correlations between biomarkers were assessed with scaled linear regression models. Abilities to discriminate between A $\beta$ - or tau-PET positive or negative participants were assessed with receiver operating characteristic (ROC) curve analysis ('pROC' package). The area under the curve (AUC) of two ROC curves was compared with bootstrapping (1000 iterations). In brief: significant differences in test metrics (e.g. AUC) were assessed by analyzing the generated distribution of the bootstrapped differences. Sensitivity, specificity, positive predictive values (PPV) and negative predictive values (NPV) were calculated using the threshold derived from the optimization of the Youden's index ('pROC' package). In a complementary analysis, for each biomarker, we grouped participants into PET-negative and further split the PET-positive group into quartiles. Wilcoxon signed-rank tests were used to compare differences between neighboring quartiles. We also looked at the associations with continuous measures of PET SUVR and cognitive performance at baseline as well as their rates of change. For the linear regression models, we included A $\beta$ -PET, tau-PET, MMSE score and mPACC as outcomes with the plasma or CSF biomarkers as predictors (1 model per biomarker and outcome). For each outcome, the adjusted R<sup>2</sup> of each biomarker model was compared using the same bootstrapping method (same sample size, 1000 iterations). Linear mixed models were used to obtain the individual rate-of-change ('lme4 package') from longitudinal A $\beta$ -PET, tau-PET, MMSE score and mPACC, using random intercepts and random time slopes. These slopes were then used as the outcome in a linear regression model with the fluid biomarkers as predictors. Again, we compared the adjusted R<sup>2</sup> of each biomarker model with bootstrapping (1000 iterations). The same analyses were performed in the Knight ADRC cohort, with the available outcomes: A $\beta$ -PET status or SUVR and a global cognitive composite. The AUC models and linear regression models were all adjusted for age and sex. Cognition models were additionally adjusted for years of education. The p-values were adjusted for multiple comparisons using the Benjamini Hochberg false discovery rate (FDR) method, applied across all comparisons per model, for each outcome. Hence, all reported p-values are FDR-corrected. Two-sided  $p < 0.05$  was considered as statistically significant. All main analyses were performed including all participants. Analyses were then repeated only in CU and only in CI as sensitivity analyses.

## Data availability

Anonymized data will be shared by request from a qualified academic investigator for the sole purpose of replicating procedures and results presented in the article and if data transfer agrees with EU legislation on the general data protection regulation and decisions by the Ethical Review Board of Sweden and Region Skåne, which should be regulated in a material transfer agreement.

## Results

### Demographics and correlations between biomarkers

Plasma and CSF concentrations were assessed in 998 individuals in the BioFINDER-2 study, with a mean age of 68.5 (12.1) and 53% women. In total, 52% ( $n = 514$ ) was considered as CU, and 48% ( $n = 484$ ) as CI (see **Table 1** for demographic information). When correlating the different plasma tests with each other, the two MS plasma methods, as expected, had the highest correlation with an  $R^2$  of 0.92, whereas other correlations ranged between 0.61 and 0.80 (**Fig. 1, Supplementary Fig. 1**). It must be noted that as p-tau217 is the numerator for %p-tau217, these measures are not independent.

### Classification of A $\beta$ -PET status

First, we assessed how well the different assays could identify individuals with an abnormal A $\beta$ -PET status using ROC analyses (**Fig. 2A**). Plasma %p-tau217<sub>WashU</sub> performed significantly better than the other plasma biomarkers with an AUC of 0.96 (all  $P_{\text{diff}} < 0.001$ ). Among the immunoassays, plasma p-tau217<sub>Lilly</sub> (AUC: 0.94) and plasma p-tau217<sub>ALZpath</sub> (AUC: 0.93) both had significantly higher AUCs than plasma p-tau217<sub>Janssen</sub> (AUC: 0.91, all  $P_{\text{diff}} < 0.016$ ) (**Supplementary Table 1**). When comparing to CSF tests, no significant difference was observed between plasma %-p-tau217<sub>WashU</sub> (AUC: 0.96) and CSF p-tau217<sub>Lilly</sub> (AUC: 0.95,  $P_{\text{diff}} = 0.074$ , **Fig. 2A**). Plasma %p-tau217<sub>WashU</sub> (AUC: 0.96) performed significantly better than CSF p-tau181/A $\beta$ 42<sub>Elecsys</sub> (AUC: 0.94,  $P_{\text{diff}} = 0.007$ ), whereas plasma p-tau217<sub>WashU</sub>, plasma p-tau217<sub>Lilly</sub>

and plasma p-tau217<sub>ALZpath</sub> performed similarly to CSF p-tau181/A $\beta$ 42<sub>Elecsys</sub> (all  $P_{diff} > 0.377$ ). Plasma p-tau217<sub>Janssen</sub> (AUC: 0.91) was inferior to CSF p-tau181/A $\beta$ 42<sub>Elecsys</sub> (AUC: 0.94,  $P_{diff} = 0.012$ ). CSF p-tau181<sub>Elecsys</sub> had the lowest AUCs of all biomarker tests (either plasma or CSF) (**Fig. 2A** and **Supplementary Table 1**).

Next, we studied the agreement between fluid biomarker tests and A $\beta$ -PET status (**Fig. 2C** and **Table 2**). Plasma %p-tau217<sub>WashU</sub> exhibited significantly higher accuracy compared to all other plasma biomarker tests (%p-tau217, 0.93; immunoassays, 0.83-0.88, all  $P_{diff} < 0.025$ ) (**Fig. 2C**). No significant differences between the accuracies of the plasma immunoassays were observed (all  $P_{diff} > 0.183$ ). Further, plasma %p-tau217<sub>WashU</sub> had a sensitivity of 91% (immunoassays: 84-87%) and a specificity of 94% (immunoassays: 85-89%) for detecting elevated A $\beta$ -PET status (**Table 2**).

## Classification of tau-PET status

Next, we examined how well the different diagnostic tests identified an abnormal tau-PET status using ROC analyses (**Fig. 2B** and **Supplementary Table 1**). Plasma %p-tau217<sub>WashU</sub> (AUC: 0.97) performed significantly better than all the plasma p-tau217 immunoassays (AUC: 0.94-0.96, all  $P_{diff} < 0.007$ ). Among the immunoassays, plasma p-tau217<sub>Lilly</sub> (AUC: 0.96) and plasma p-tau217<sub>Janssen</sub> (AUC: 0.95) did not perform differently from each other ( $P_{diff} = 0.162$ );). However, plasma p-tau217<sub>Lilly</sub> (AUC: 0.96) had a significantly higher AUC than plasma p-tau217<sub>ALZpath</sub> (AUC: 0.94,  $P_{diff} = 0.025$ ). When comparing to CSF tests, plasma %p-tau217<sub>WashU</sub>, plasma p-tau217<sub>WashU</sub> and CSF p-tau217<sub>Lilly</sub> had significantly higher AUCs (0.96-0.97) than CSF p-tau181/A $\beta$ 42<sub>Elecsys</sub> (AUC: 0.94, all  $P_{diff} < 0.009$ ), but plasma p-tau217<sub>Janssen</sub> and ptau217<sub>ALZpath</sub> (AUC: 0.94-0.95) performed comparable to CSF p-tau181/A $\beta$ 42<sub>Elecsys</sub> (all  $P_{diff} > 0.404$ ). CSF p-tau181<sub>Elecsys</sub> had the lowest AUC (0.87), and all other assays (either from plasma or CSF) were superior.

When the accuracies were compared, no significant differences were observed between any of the fluid biomarkers, which ranged between 0.80 and 0.89 (**Fig. 2D**). More information regarding sensitivity and specificity can be found in **Table 2**.

## Distinguishing between PET quantiles

To better understand how the different fluid biomarkers tracked changes in the levels of the AD proteinopathies, we examined the levels of each fluid biomarker test between different PET stages (PET-negative participants in the “Negative” group and PET-positive participants further split into quartiles [Q1-Q4]). When grouping individuals by A $\beta$ -PET SUVR, the CSF measures plateaued in individuals with the highest levels of A $\beta$  pathology (between Q3 and Q4), but the plasma biomarkers continued to increase with higher PET load (**Fig. 3A**). For tau-PET, more differences were observed. Plasma %p-tau217<sub>WashU</sub>, plasma p-tau217<sub>WashU</sub> and plasma p-tau217<sub>Lilly</sub> did not plateau at later stages of tau-PET positivity and continued to increase with higher PET loads. Plasma p-tau217<sub>Janssen</sub> did not show a significant difference when comparing Q2 and Q3 stage but did for the other stages. Plasma p-tau217<sub>ALZpath</sub> only showed a significant difference when comparing the tau-PET negative group to Q1, and Q2 and Q2, but was not different for the other quantiles. The CSF Elecsys measures (p-tau181/A $\beta$ 42 and p-tau181) plateaued after distinguishing between the negative group and Q1, but CSF p-tau217<sub>Lilly</sub> did not (**Fig. 3B**).

## Associations with A $\beta$ -PET load

Next, we examined the associations between fluid biomarker test outcomes at baseline and i) A $\beta$ -PET load at baseline, and ii) the rate of change of A $\beta$ -PET load during follow-up. The results are given in **Fig. 4A** (cross-sectional analyses) and **Fig. 4C** (longitudinal analyses) with additional information in **Supplementary Tables 2 & 3** and **Supplementary Fig. 2 & 3**. Results across the different assays were very consistent between the two types of analyses. Overall, plasma %p-tau217<sub>WashU</sub> showed the strongest association with A $\beta$ -PET values, performing significantly better than all the plasma p-tau217 immunoassays with an  $R^2$  of 0.72 in the cross-sectional analysis (immunoassays: 0.47-0.58; all  $P_{\text{diff}} < 0.001$ ), and with an  $R^2$  of 0.53 in the longitudinal analysis (immunoassays: 0.31-0.38; all  $P_{\text{diff}} < 0.005$ ). Among the immunoassays, plasma p-tau217<sub>Lilly</sub> ( $R^2_{\text{cross-sectional}}$ : 0.58,  $R^2_{\text{longitudinal}}$ : 0.38) and p-tau217<sub>ALZpath</sub> ( $R^2_{\text{cross-sectional}}$ : 0.56,  $R^2_{\text{longitudinal}}$ : 0.37) had a significantly higher  $R^2$  than plasma p-tau217<sub>Janssen</sub> ( $R^2_{\text{cross-sectional}}$ : 0.47,  $R^2_{\text{longitudinal}}$ : 0.31) in both the cross-sectional and longitudinal analyses (all  $P_{\text{diff}} < 0.020$ ) and did not differ from each other. When comparing plasma p-tau217 tests to CSF tests, plasma %p-tau217<sub>WashU</sub> ( $R^2_{\text{cross-sectional}}$ : 0.72,  $R^2_{\text{longitudinal}}$ : 0.53) performed significantly better than CSF p-

tau217<sub>Lilly</sub> ( $R^2_{\text{cross-sectional}}$ : 0.65,  $R^2_{\text{longitudinal}}$ : 0.46) in both the cross-sectional and longitudinal analyses (all  $P_{\text{diff}} < 0.034$ ) and than CSF p-tau181/A $\beta$ 42<sub>Elecsys</sub> ( $R^2_{\text{cross-sectional}}$ : 0.62,  $R^2_{\text{longitudinal}}$ : 0.48) at the cross-sectional level ( $P_{\text{diff}} = 0.001$ ). CSF p-tau217<sub>Lilly</sub>, however, performed significantly better than plasma p-tau217<sub>Lilly</sub>, plasma p-tau217<sub>Janssen</sub> and p-tau217<sub>ALZpath</sub> in both the cross-sectional and longitudinal analyses (all  $P_{\text{diff}} < 0.021$ ). CSF p-tau181/A $\beta$ 42<sub>Elecsys</sub> performed better than p-tau217<sub>Janssen</sub> in cross-sectional and longitudinal analyses ( $P_{\text{diff}} < 0.012$ ) and p-tau217<sub>ALZpath</sub> ( $R^2$ : 0.37) in the longitudinal analyses ( $P_{\text{diff}} = 0.005$ ). In the cross-sectional analyses, all plasma and CSF assays had stronger associations with A $\beta$ -PET values than CSF p-tau181<sub>Elecsys</sub> ( $R^2_{\text{cross-sectional}}$ : 0.38,  $R^2_{\text{longitudinal}}$ : 0.25). This was replicated in the longitudinal analyses, except for plasma p-tau217<sub>Janssen</sub>.

## Associations with tau-PET load

We then examined the associations between biomarker performance and tau-PET load. The results are given in **Fig. 4B** (cross-sectional analyses) and **Fig. 4D** (longitudinal analyses) with additional information in **Supplementary Tables 2 & 3** and **Supplementary Fig. 4 & 5**. Results were similar across both the cross-sectional and longitudinal analyses. Plasma %p-tau217<sub>washU</sub> performed significantly better than all the plasma p-tau217 immunoassays with an  $R^2$  of 0.51 in the cross-sectional analysis (immunoassays: 0.38-0.45; all  $P_{\text{diff}} < 0.001$ ), and with an  $R^2$  of 0.50 in the longitudinal analysis (immunoassays: 0.35-0.43; all  $P_{\text{diff}} < 0.014$ ). Among the plasma immunoassays, plasma p-tau217<sub>Lilly</sub> ( $R^2_{\text{cross-sectional}}$ : 0.45,  $R^2_{\text{longitudinal}}$ : 0.43) performed significantly better than p-tau217<sub>Janssen</sub> ( $R^2_{\text{cross-sectional}}$ : 0.39,  $R^2_{\text{longitudinal}}$ : 0.36) and p-tau217<sub>ALZpath</sub> ( $R^2_{\text{cross-sectional}}$ : 0.38,  $R^2_{\text{longitudinal}}$ : 0.35) in both cross-sectional (all  $P_{\text{diff}} < 0.001$ ) and longitudinal analyses (all  $P_{\text{diff}} < 0.019$ ). Plasma p-tau217<sub>Janssen</sub> and plasma p-tau217<sub>ALZpath</sub> did not differ from each other in either analysis.

When comparing plasma p-tau217 tests to CSF tests, we found that plasma %p-tau217<sub>washU</sub> ( $R^2_{\text{cross-sectional}}$ : 0.51,  $R^2_{\text{longitudinal}}$ : 0.50) had a significantly higher  $R^2$  than both CSF p-tau217<sub>Lilly</sub> ( $R^2_{\text{cross-sectional}}$ : 0.47,  $R^2_{\text{longitudinal}}$ : 0.44) and CSF p-tau181/A $\beta$ 42<sub>Elecsys</sub> ( $R^2_{\text{cross-sectional}}$ : 0.44,  $R^2_{\text{longitudinal}}$ : 0.41) in both the cross-sectional (all  $P_{\text{diff}} < 0.015$ ) and longitudinal analyses (all  $P_{\text{diff}} < 0.043$ ). However, CSF p-tau217<sub>Lilly</sub> ( $R^2_{\text{cross-sectional}}$ : 0.47,  $R^2_{\text{longitudinal}}$ : 0.44) performed better than both p-tau217<sub>Janssen</sub> ( $R^2_{\text{cross-sectional}}$ : 0.39,  $R^2_{\text{longitudinal}}$ : 0.36) and plasma p-tau217<sub>ALZpath</sub> in both the cross-sectional (all  $P_{\text{diff}} < 0.001$ ) and longitudinal analyses ( $R^2_{\text{cross-sectional}}$ : 0.38,  $R^2_{\text{longitudinal}}$ :

0.35, all  $P_{\text{diff}} < 0.017$ ). Further, CSF p-tau181/A $\beta$ 42<sub>Elecsys</sub> performed better than plasma p-tau217<sub>ALZpath</sub> in the cross-sectional analysis ( $P_{\text{diff}} = 0.037$ ). CSF p-tau181<sub>Elecsys</sub> performed worse than all other tests.

## Associations with cognition

We next examined the biomarker associations with cognition cross-sectionally. The results were generally similar for both cross-sectional analyses of MMSE (**Fig. 5A**) and mPACC (**Fig. 5B**) and further information are given in **Supplementary Table 2** and **Supplementary Fig. 6 & 7**. Plasma %p-tau217<sub>WashU</sub> had the largest cross-sectional associations with cognitive measures with an  $R^2$  of 0.33 for MMSE and 0.37 for the mPACC when controlling for age, sex and years of education. Plasma %p-tau217<sub>WashU</sub> showed significantly larger associations with MMSE compared to all plasma p-tau217 immunoassays ( $R^2$ : 0.27-0.30, all  $P_{\text{diff}} < 0.024$ ), and larger associations with mPACC than plasma p-tau217<sub>Lilly</sub> ( $R^2$ : 0.33) and plasma p-tau217<sub>Janssen</sub> ( $R^2$ : 0.33, all  $P_{\text{diff}} < 0.024$ ). When comparing plasma and CSF tests, plasma %p-tau217<sub>WashU</sub> was equal or better compared to the CSF tests. CSF p-tau217<sub>Lilly</sub> ( $R^2$ : 0.34) exhibited stronger associations with MMSE than all plasma immunoassays (all  $P_{\text{diff}} < 0.042$ ). Further, CSF p-tau181/A $\beta$ 42<sub>Elecsys</sub> ( $R^2$ : 0.32) exhibited stronger associations with MMSE than plasma p-tau217<sub>Janssen</sub> ( $R^2$ : 0.27) and p-tau217<sub>ALZpath</sub> ( $R^2$ : 0.27, all  $P_{\text{diff}} < 0.030$ ). With the mPACC as the outcome, both CSF p-tau217<sub>Lilly</sub> ( $R^2$ : 0.37) and CSF p-tau181/A $\beta$ 42<sub>Elecsys</sub> ( $R^2$ : 0.38) exhibited stronger associations than plasma p-tau217<sub>Lilly</sub> ( $R^2$ : 0.33) and p-tau217<sub>Janssen</sub> ( $R^2$ : 0.33, all  $P_{\text{diff}} < 0.043$ ).

We next examined the biomarker associations with cognition longitudinally. The results were generally similar for both longitudinal analyses of MMSE (**Fig. 5C**) and mPACC (**Fig. 5D**). Further information is given in **Supplementary Table 3** and **Supplementary Fig. 8 & 9**. Plasma %p-tau217<sub>WashU</sub> had the strongest association with change in MMSE ( $R^2$ : 0.48), which was significantly higher than all CSF tests ( $R^2$ : 0.26-0.42) as well as plasma p-tau217<sub>Janssen</sub> ( $R^2$ : 0.38) and p-tau217<sub>ALZpath</sub> ( $R^2$ : 0.37, all  $P_{\text{diff}} < 0.025$ ). Plasma p-tau217<sub>Lilly</sub> ( $R^2$ : 0.45) showed a stronger association with change in MMSE than plasma p-tau217<sub>Janssen</sub> ( $R^2$ : 0.38), plasma p-tau217<sub>ALZpath</sub> ( $R^2$ : 0.37), CSF p-tau181/A $\beta$ 42<sub>Elecsys</sub> ( $R^2$ : 0.39) and CSF p-tau181<sub>Elecsys</sub> ( $R^2$ : 0.26, all  $P_{\text{diff}} < 0.030$ ). No differences between plasma p-tau217<sub>Janssen</sub> and plasma p-tau217<sub>ALZpath</sub> were observed

here. For the longitudinal of change in mPACC, fewer differences between assays were observed. Plasma %p-tau217<sub>WashU</sub> ( $R^2$ : 0.40) performed better than plasma p-tau217<sub>Janssen</sub> ( $R^2$ : 0.32) and plasma p-tau217<sub>ALZpath</sub> ( $R^2$ : 0.34, all  $P_{diff} < 0.035$ ). When comparing plasma immunoassays, plasma p-tau217<sub>Lilly</sub> ( $R^2$ : 0.37) performed better than plasma p-tau217<sub>Janssen</sub> ( $R^2$ : 0.32,  $P_{diff} = 0.018$ ), but not better than plasma p-tau217<sub>ALZpath</sub> ( $R^2$ : 0.34). Plasma p-tau217<sub>Janssen</sub> and plasma p-tau217<sub>ALZpath</sub> performed similarly ( $P_{diff} = 0.210$ ).

## Subgroups analyses in cognitively unimpaired and impaired individuals

All analyses were repeated when analyzing CU and CI individuals separately. In general, the results were similar to the ones obtained when analyzing the whole cohort, but a few differences were observed. In CI individuals, no significant differences were observed between plasma %p-tau217<sub>WashU</sub>, plasma p-tau217<sub>Lilly</sub> and plasma p-tau217<sub>Janssen</sub> regarding the rate of change in tau-PET values ( $R^2$  between 0.50-0.54). Further, all four plasma biomarkers performed significantly better in CI individuals than plasma p-tau217<sub>ALZpath</sub> in this context ( $P_{diff} < 0.012$ ). All results regarding the subgroup analyses can be found in **Supplementary Table 4** and **Supplementary Fig. 10-14**.

## Replication in the Knight ADRC cohort

We replicated the main cross-sectional analyses in the Knight ADRC cohort ( $n = 219$ ) when using A $\beta$ -PET and cognition as the outcomes and the following predictors: plasma %p-tau217<sub>WashU</sub>, plasma p-tau217<sub>WashU</sub>, plasma p-tau217<sub>Lilly</sub>, CSF p-tau181/A $\beta$ <sub>Lumipulse</sub> and CSF p-tau181<sub>Lumipulse</sub> (for demographics see **Supplementary Table 5**). In this cohort, plasma %p-tau217<sub>WashU</sub> had a significantly higher AUC (AUC: 0.97) than plasma p-tau217<sub>Lilly</sub> (AUC: 0.93,  $P_{diff} = 0.020$ ) for detecting A $\beta$ -PET positive participants. Plasma %p-tau217<sub>WashU</sub> (AUC: 0.97) also performed significantly better than CSF p-tau181/A $\beta$ <sub>Lumipulse</sub> (AUC: 0.87,  $P_{diff} = 0.001$ ) (**Fig. 6**). When examining associations with baseline A $\beta$ -PET values, plasma %p-tau217<sub>WashU</sub> showed a significantly better association ( $R^2$ : 0.61) than plasma p-tau217<sub>WashU</sub> ( $R^2$ : 0.54), plasma p-tau217<sub>Lilly</sub> ( $R^2$ : 0.46) and CSF p-tau181/A $\beta$ <sub>Lumipulse</sub> ( $R^2$ : 0.42, all  $P_{diff} < 0.004$ ). No differences were observed between biomarkers regarding their associations with cognition.

## NULISA sub-sample

In the NULISA BioFINDER-2 sub-sample ( $n = 463$ , **Supplementary Table 6**), we repeated the cross-sectional analyses and validated them in the Knight ADRC cohort NULISA sub-sample ( $n = 97$ ) with the biomarkers that were available in both cohorts. Plasma %p-tau217<sub>WashU</sub> outperformed plasma p-tau217<sub>NULISA</sub> regarding A $\beta$ -PET status (AUC<sub>%WashU</sub>: 0.96; AUC<sub>NULISA</sub>: 0.93,  $P_{diff} = 0.038$ ) and A $\beta$ -PET load ( $R^2_{\%WashU}$ : 0.70;  $R^2_{NULISA}$ : 0.60,  $P_{diff} = 0.002$ ) (**Supplementary Fig. 15**). Plasma %p-tau217<sub>WashU</sub> was also superior to plasma p-tau217<sub>NULISA</sub> regarding tau-PET status (AUC<sub>%WashU</sub>: 0.96; AUC<sub>NULISA</sub>: 0.93,  $P_{diff} = 0.038$ ), and tau-PET values ( $R^2_{\%WashU}$ : 0.43;  $R^2_{NULISA}$ : 0.34,  $P_{diff} = 0.048$ ). In the Knight ADRC cohort, no differences were observed regarding A $\beta$ -PET status, but plasma %p-tau217<sub>WashU</sub> showed a significantly larger associations with A $\beta$ -PET values than plasma p-tau217<sub>NULISA</sub> ( $R^2_{\%WashU}$ : 0.62;  $R^2_{NULISA}$ : 0.31,  $P_{diff} = 0.001$ ) (**Supplementary Fig. 16**).

## Discussion

In this study, we performed a head-to-head comparison of different key plasma p-tau217 tests, including both MS- and immunoassay-based methods. We compared blood and CSF tests to determine A $\beta$ - and tau-PET status at baseline, and how they were associated with baseline levels and the rate of change in A $\beta$ - and tau-PET values and cognitive test scores. All plasma p-tau217 tests showed high AUCs and accuracies when identifying individuals with an abnormal A $\beta$ - and tau-PET status. Across the different analyses, plasma %p-tau217<sub>WashU</sub> (measured with MS) performed consistently superior to all the immunoassay tests. Further, plasma %p-tau217<sub>WashU</sub> performance was non-inferior, or even superior to FDA-approved CSF measures across all analyses, as previously shown for A $\beta$ - and tau-PET status<sup>7</sup>, but we now also show similar findings for either PET load or cognitive function cross-sectionally as well as longitudinally. Further, we found that among the tested immunoassays, plasma p-tau217<sub>Lilly</sub> often performed better than plasma p-tau217<sub>Janssen</sub> and was non-inferior to the CSF tests in most models. Plasma p-tau217<sub>Janssen</sub> performed similarly to p-tau217<sub>ALZpath</sub> when using tau-PET as the outcome, but p-tau217<sub>ALZpath</sub> often performed better when using A $\beta$ -PET as the outcome. CSF p-tau181, which is



typically used in a clinical setting for work-up of AD patients, however, was in almost all cases significantly inferior to the other biomarkers.

One of the main questions concerning the plasma assays is the distinction between MS and immuno-based approaches. Whereas MS methods allow simultaneous quantification of different peptides, but they often come at a higher cost due to more expensive equipment and lower analysis throughput.<sup>41</sup> Immunoassays, on the other hand, provide a cheaper alternative, although their results may be subject to higher measurement variability.<sup>41,42</sup> Previously, plasma %p-tau217<sub>WashU</sub> has demonstrated superior performance compared to immunoassays<sup>7,8</sup>. We have shown in a different cohort that plasma p-tau217<sub>WashU</sub> had a very high accuracy for discriminating between a normal and abnormal CSF A $\beta$  status in 135 MCI patients and had the highest AUC to identify patients who progressed to dementia, performing significantly better than immunoassays<sup>8</sup>. In the current study, we replicated and extended these results with additional p-tau217 tests in a larger sample consisting of both cognitively unimpaired and cognitively impaired individuals. When discriminating between normal and abnormal A $\beta$ -PET, no significant differences were observed between MS plasma p-tau217<sub>WashU</sub> (not the ratio) and plasma p-tau217<sub>Lilly</sub> in the current study, which was replicated in the validation cohort. Thus, the significant differences in performance observed here may be due to implementation of the ratio phosphorylated to non-phosphorylated rather than measurement technique. For tau-PET load, however, both MS-based plasma %p-tau217<sub>WashU</sub> and plasma p-tau217<sub>WashU</sub> performed significantly better than immunoassay-based plasma p-tau217<sub>Lilly</sub> and plasma p-tau217<sub>Janssen</sub>, suggesting MS-based methods may be more precise than immunoassays, at least those included in this study, in identifying patients at later stages of the disease.

However, there are also notable differences between the different immunoassays. For instance, the immunoassays included in this head-to-head comparison did not always showcase equal performance. Although all immunoassays performed very well, plasma p-tau217<sub>Lilly</sub> and plasma p-tau217<sub>ALZpath</sub> both had a significantly higher AUC for A $\beta$ -PET status and showed stronger associations with baseline and longitudinal A $\beta$ -PET load than plasma p-tau217<sub>Janssen</sub>. Plasma p-tau217<sub>Lilly</sub> additionally showed significantly stronger associations with tau-PET load, as well as with the longitudinal accumulation of both A $\beta$ - and tau pathology, and was more strongly

associated with the rate of change in cognition, than both plasma p-tau217<sub>Janssen</sub> and plasma p-tau217<sub>ALZpath</sub>. A recent study comparing plasma p-tau217<sub>Janssen</sub> to p-tau217<sub>ALZpath</sub> found that both assays were highly associated with A $\beta$ - and tau-PET SUVR values as well as PET status in a sample ( $n = 294$ ) consisting of CU and CI individuals.<sup>13</sup> Another previous study in a different cohort of ours ( $n = 147$ ) compared plasma p-tau217<sub>Lilly</sub> to plasma p-tau217<sub>Janssen</sub> in MCI patients and found they were similarly associated with A $\beta$ -status in CSF and annual change in MMSE scores.<sup>12</sup> Although plasma p-tau217<sub>Janssen</sub> performed similarly to other assays in these studies, we found that when comparing plasma p-tau217<sub>Janssen</sub> to other assays, its performance is slightly, but significantly, worse in its associations with A $\beta$ -PET. The current study population consists of a larger sample, which increases the power to detect more subtle differences in assay performances. These differences may be explained by the differences in assays; the p-tau217<sub>Janssen</sub> assay additionally targets p-tau212.<sup>27</sup> This cross-reactivity might contribute to its overall slightly inferior performance compared to plasma p-tau217<sub>Lilly</sub>. Another difference between the immunoassays is that the detection antibody used in the Lilly assay does not detect big tau, which is mainly released from peripheral sources, unlike the other immunoassays used in the present study. Noteworthy, in all analyses, CSF p-tau181<sub>Elecsys</sub> showed the worst performance out of all fluid biomarker tests. On the other hand, the plasma p-tau217 measures, as well as CSF p-tau217<sub>Lilly</sub>, showed stronger associations with disease pathology and cognition, suggesting the superiority of p-tau217 in plasma as well as in CSF over p-tau181 in CSF. This is in line with previous results<sup>24,43</sup> and may be important for clinical use of fluid biomarkers.

Recently, the Global CEO Initiative on Alzheimer's disease defined acceptable performance of blood biomarker tests of A $\beta$  pathology.<sup>15</sup> They suggested that a test should have a sensitivity and specificity of at least 90% to be used as a stand-alone confirmatory test where a subsequent test is not needed confirm to A $\beta$ -status. Further, the recent update of the criteria for diagnosis and staging of Alzheimer's disease lead by the Alzheimer's Association suggested that a stand-alone biomarker test should exhibit an accuracy of 90%.<sup>44</sup> In the current study, only %p-tau217<sub>WashU</sub> fulfilled these requirements when detecting A $\beta$ -PET status. This was also the case when analyzing CU and CI separately. If the current results are confirmed in other large-scale cohorts, it suggests that mainly %p-tau217<sub>WashU</sub> can be used as a confirmatory test. The p-tau217 immunoassays might instead be used as triaging tests where a positive plasma test result must be

confirmed by a second test such as A $\beta$ -PET. Alternatively, a two-cut point approach can be used for the p-tau217 immunoassays where test results below a lower cut point or above a higher cut point are regarded as confirmatory of a negative or positive A $\beta$ -status, respectively. However, patients with intermediate results, which are between the two cut points, need to undergo a subsequent more high-performing test.<sup>33</sup>

This study has important strengths over previous studies. First, it included a large sample size consisting of both CU and CI individuals. Furthermore, we conducted a comprehensive comparison of multiple different key p-tau217 assays, including both MS- and immuno-based assays, and evaluated their performance against several and clinically relevant outcomes, with highly consistent results. We studied how the different p-tau217 tests were associated with baseline and the rate of change in A $\beta$ - and tau-PET values, and cognitive test scores, which has not been done before. Nonetheless, this work is not without limitations. Firstly, A $\beta$ -PET was not available in patients with a dementia diagnosis by study design, hence this patient group was excluded from analyses using A $\beta$ -PET as an outcome. The sample was further reduced when examining longitudinal changes in AD pathology, although it still consisted of a considerably large sample. However, considering disease-modifying therapies will likely target individuals at early stages of the disease, it is important to assess how plasma p-tau217 performs as a biomarker also in cognitively unimpaired individuals alone, as we have done in the present study. Further replication of these findings in other cohorts are warranted as performance could be affected by the prevalence of amyloid positivity in the cohort, the relative distribution of participants at different stages of amyloid deposition, or the prevalence of participants with other neurological disorders, as suggested by the somewhat better performance of the MS assay in the Knight ADRC cohort. Such replications will be required to fully comprehend how blood-based biomarkers perform among different populations.<sup>45-47</sup> Biomarker performance and their accessibility and feasibility outside the research setting should additionally be further investigated. Here, it will be important to examine the additional plasma p-tau217 assays (from other vendors) that might become commercially available in the future.

In summary, all plasma p-tau217 biomarkers in this study consistently and reliably detected abnormalities in A $\beta$ -PET and tau-PET. However, associations with A $\beta$ -PET and tau-PET values,

and with cognition, differed between the different plasma and CSF tests. Overall, plasma %p-tau<sub>217</sub> measured with MS was superior to the immunoassay-based plasma p-tau<sub>217</sub> tests. We also observed differences in performance between immunoassays, in which p-tau<sub>217</sub><sub>Lilly</sub> was superior to p-tau<sub>217</sub><sub>Janssen</sub> and p-tau<sub>217</sub><sub>ALZpath</sub>, but the differences were in general rather minor. If the current results are replicated in other large-scale cohorts, plasma %p-tau<sub>217</sub> might potentially be the only blood tests that currently fulfils the suggested criteria to be used as a stand-alone confirmatory test of presence of AD pathology. However, the evaluated p-tau<sub>217</sub> immunoassays might be more suitable for use as triaging tests where positive or intermediate test results must be confirmed with a second test like PET.

## Funding

The study was supported by the National Institute of Aging (R01AG083740), European Research Council (ADG-101096455), Alzheimer's Association (ZEN24-1069572, SG-23-1061717), GHR Foundation, Swedish Research Council (2022-00775, 2021-02219), ERA PerMed (ERAPERMED2021-184), Knut and Alice Wallenberg foundation (2022-0231), Strategic Research Area MultiPark (Multidisciplinary Research in Parkinson's disease) at Lund University, Swedish Alzheimer Foundation (AF-980907, AF-994229), Swedish Brain Foundation (FO2021-0293, FO2023-0163), Parkinson foundation of Sweden (1412/22), Cure Alzheimer's fund, Rönström Family Foundation, WASP and DDLS Joint call for research projects (WASP/DDLS22-066), Konung Gustaf V:s och Drottning Victorias Frimurarestiftelse, Skåne University Hospital Foundation (2020-O000028), Regionalt Forskningsstöd (2022-1259) and Swedish federal government under the ALF agreement (2022-Projekt0080, 2022-Projekt0107). The Knight ADRC cohort was supported by National Institute on Aging grants P30AG066444, P01AG03991, and P01AG026276. G.S. received funding from the European Union's Horizon 2020 Research and Innovation Program under Marie Skłodowska-Curie action grant agreement number 101061836, an Alzheimer's Association Research Fellowship (AARF-22-972612), the Alzheimerfonden (AF-980942), Greta och Johan Kocks research grants and travel grants from the Strategic Research Area MultiPark (Multidisciplinary Research in Parkinson's Disease) at Lund University. S.E.S. has received funding from the National Institute on Aging (#R01AG070941). J.C.M has received funding from the National Institute on Aging

(#P30AG066444, # P01AG003991, and # P01AG026276). N.R.B. received funding from the Alzheimer's Association Research Fellowship (AARF-16-443265), the Coins for Alzheimer's Research Trust, Knight ADRC Developmental Projects and the Tracy Family SILQ Center which supported the development of the plasma p-tau MS assay and data collection for this study. R.J.B. support was from the Tracy Family SILQ Center. Alamar/NULIS data from WU was generated with support by grants from the National Institutes of Health (R01AG044546 (CC), P01AG003991(CC, JCM), RF1AG053303 (CC), RF1AG058501 (CC), U01AG058922 (CC), RF1AG074007 (YJS)), the Chan Zuckerberg Initiative (CZI), the Michael J. Fox Foundation (LI, CC), the Department of Defense (LI- W81XWH2010849), the Alzheimer's Association Zenith Fellows Award (ZEN-22-848604, awarded to CC), and an Anonymous foundation. This work was supported by access to equipment made possible by the Hope Center for Neurological Disorders, the Neurogenomics and Informatics Center (NGI: <https://neurogenomics.wustl.edu/>) and the Departments of Neurology and Psychiatry at Washington University School of Medicine. H.Z. is a Wallenberg Scholar and a Distinguished Professor at the Swedish Research Council supported by grants from the Swedish Research Council (#2023-00356; #2022-01018 and #2019-02397), the European Union's Horizon Europe research and innovation programme under grant agreement No 101053962, and Swedish State Support for Clinical Research (#ALFGBG-71320). The precursor of  $^{18}\text{F}$ -flutemetamol was sponsored by GE Healthcare. The precursor of  $^{18}\text{F}$ -RO948 was provided by Roche. The funding sources had no role in the design and conduct of the study; in the collection, analysis, interpretation of the data; or in the preparation, review, or approval of the manuscript.

## Competing interests

N.W, G.S, S.J, N.M.C, D.B, A.O.D, H.K, A.A, C.A.R, T.L.S.B, J.C.M, L.I, J.T, N.J.A., B.A, K.B, and A.P.B report no competing interests.

N.R.B is co-inventor on a US patent application "Methods to detect novel tau species in CSF and use thereof to track tau neuropathology in Alzheimer's disease and other tauopathies," and "CSF phosphorylated tau and Amyloid beta profiles as biomarkers of tauopathies." N.R.B is co-inventors on a non-provisional patent application "Methods of Diagnosing and Treating Based on Site-Specific Tau Phosphorylation." NRB receives royalty income based on technology

(blood plasma assay and methods of diagnosing AD with phosphorylation changes) licensed by Washington University to C2N Diagnostics. N.R.B. and R.J.B. are co-inventors on US patent applications: ‘Methods to detect novel tau species in CSF and use thereof to track tau neuropathology in Alzheimer’s disease and other tauopathies’ and ‘CSF phosphorylated tau and amyloid beta profiles as biomarkers of tauopathies’.

G.T.B is an employee of Johnson and Johnson Innovative Medicine.

S.E.S has received consultancy/speaker fees from Eisai, Eli Lilly, and Novo Nordisk.

C.C has received research support from: GSK and Eisai. C.C is a member of the scientific advisory board of Circular Genomics and owns stocks. C.C is a member of the scientific advisory board of Admit.

H.Z. has served at scientific advisory boards and/or as a consultant for Abbvie, Acumen, Alector, Alzinova, ALZPath, Amylyx, Annexon, Apellis, Artery Therapeutics, AZTherapies, Cognito Therapeutics, CogRx, Denali, Eisai, LabCorp, Merry Life, Nervgen, Novo Nordisk, Optoceutics, Passage Bio, Pinteon Therapeutics, Prothena, Red Abbey Labs, reMYND, Roche, Samumed, Siemens Healthineers, Triplet Therapeutics, and Wave, has given lectures in symposia sponsored by Alzecure, Biogen, Cellectricon, Fujirebio, Lilly, Novo Nordisk, and Roche, and is a co-founder of Brain Biomarker Solutions in Gothenburg AB (BBS), which is a part of the GU Ventures Incubator Program (outside submitted work).

N.R.B. and R.J.B. are co-inventors on a non-provisional patent application: ‘Methods of diagnosing and treating based on site-specific tau phosphorylation’. R.J.B. co-founded C2N Diagnostics. Washington University and R.J.B. have equity ownership interest in C2N Diagnostics and receive royalty income based on technology (stable isotope labeling kinetics, blood plasma assay and methods of diagnosing Alzheimer’s disease with phosphorylation changes) that is licensed by Washington University to C2N Diagnostics. R.J.B. receives income from C2N Diagnostics for serving on the scientific advisory board. R.J.B. has received research funding from Avid Radiopharmaceuticals, Janssen, Roche/Genentech, Eli Lilly, Eisai, Biogen, AbbVie, Bristol Myers Squibb and Novartis.

O.H. has acquired research support (for the institution) from AVID Radiopharmaceuticals, Biogen, C2N Diagnostics, Eli Lilly, Eisai, Fujirebio, GE Healthcare, and Roche. In the past 2 years, he has received consultancy/speaker fees from Alzpath, BioArctic, Biogen, Bristol Meyer Squibb, Eisai, Eli Lilly, Fujirebio, Merck, Novartis, Novo Nordisk, Roche, Sanofi and Siemens.

## Supplementary material

Supplementary material is available at *Brain* online.

## References

1. Hansson O, Blennow K, Zetterberg H, Dage J. Blood biomarkers for Alzheimer's disease in clinical practice and trials. *Nature Aging*. 2023/05/01 2023;3(5):506-519. doi:10.1038/s43587-023-00403-3
2. Hansson O, Edelmayer RM, Boxer AL, et al. The Alzheimer's Association appropriate use recommendations for blood biomarkers in Alzheimer's disease. *Alzheimers Dement*. Dec 2022;18(12):2669-2686. doi:10.1002/alz.12756
3. Hansson O. Biomarkers for neurodegenerative diseases. *Nature Medicine*. 2021/06/01 2021;27(6):954-963. doi:10.1038/s41591-021-01382-x
4. Sims JR, Zimmer JA, Evans CD, et al. Donanemab in Early Symptomatic Alzheimer Disease: The TRAILBLAZER-ALZ 2 Randomized Clinical Trial. *JAMA*. 2023;330(6):512-527. doi:10.1001/jama.2023.13239
5. van Dyck CH, Swanson CJ, Aisen P, et al. Lecanemab in Early Alzheimer's Disease. *New England Journal of Medicine*. 2022;388(1):9-21. doi:10.1056/NEJMoa2212948
6. Ashton NJ, Janelidze S, Mattsson-Carlsson N, et al. Differential roles of A $\beta$ 42/40, p-tau231 and p-tau217 for Alzheimer's trial selection and disease monitoring. *Nature Medicine*. 2022/12/01 2022;28(12):2555-2562. doi:10.1038/s41591-022-02074-w
7. Barthélemy NR, Salvadó G, Schindler SE, et al. Highly accurate blood test for Alzheimer's disease is similar or superior to clinical cerebrospinal fluid tests. *Nature Medicine*. 2024/02/21 2024;doi:10.1038/s41591-024-02869-z

8. Janelidze S, Bali D, Ashton NJ, et al. Head-to-head comparison of 10 plasma phospho-tau assays in prodromal Alzheimer's disease. *Brain*. Apr 19 2023;146(4):1592-1601. doi:10.1093/brain/awac333
9. Mattsson-Carlgrén N, Collij LE, Stomrud E, et al. Plasma Biomarker Strategy for Selecting Patients With Alzheimer Disease for Anti-amyloid Immunotherapies. *JAMA Neurology*. 2024;81(1):69-78. doi:10.1001/jamaneurol.2023.4596
10. Mattsson-Carlgrén N, Salvadó G, Ashton NJ, et al. Prediction of Longitudinal Cognitive Decline in Preclinical Alzheimer Disease Using Plasma Biomarkers. *JAMA Neurol*. Apr 1 2023;80(4):360-369. doi:10.1001/jamaneurol.2022.5272
11. Ashton NJ, Puig-Pijoan A, Milà-Alomà M, et al. Plasma and CSF biomarkers in a memory clinic: Head-to-head comparison of phosphorylated tau immunoassays. *Alzheimers Dement*. May 2023;19(5):1913-1924. doi:10.1002/alz.12841
12. Groot C, Cicognola C, Bali D, et al. Diagnostic and prognostic performance to detect Alzheimer's disease and clinical progression of a novel assay for plasma p-tau217. *Alzheimers Res Ther*. May 14 2022;14(1):67. doi:10.1186/s13195-022-01005-8
13. Therriault J, Ashton NJ, Pola I, et al. Comparison of two plasma p-tau217 assays to detect and monitor Alzheimer's pathology. *eBioMedicine*. 2024/04/01/ 2024;102:105046. doi:<https://doi.org/10.1016/j.ebiom.2024.105046>
14. Bayoumy S, Verberk IMW, den Dulk B, et al. Clinical and analytical comparison of six Simoa assays for plasma P-tau isoforms P-tau181, P-tau217, and P-tau231. *Alzheimers Res Ther*. Dec 4 2021;13(1):198. doi:10.1186/s13195-021-00939-9
15. Schindler SE, Galasko D, Pereira AC, et al. Acceptable performance of blood biomarker tests of amyloid pathology — recommendations from the Global CEO Initiative on Alzheimer's Disease. *Nature Reviews Neurology*. 2024/06/12 2024;doi:10.1038/s41582-024-00977-5
16. Palmqvist S, Rossi M, Hall S, et al. Cognitive effects of Lewy body pathology in clinically unimpaired individuals. *Nature Medicine*. 2023/08/01 2023;29(8):1971-1978. doi:10.1038/s41591-023-02450-0
17. Jack Jr. CR, Bennett DA, Blennow K, et al. NIA-AA Research Framework: Toward a biological definition of Alzheimer's disease. *Alzheimer's & Dementia*. 2018;14(4):535-562. doi:<https://doi.org/10.1016/j.jalz.2018.02.018>
18. Ossenkoppele R, Smith R, Ohlsson T, et al. Associations between tau, A $\beta$ , and cortical thickness with cognition in Alzheimer disease. *Neurology*. Feb 5 2019;92(6):e601-e612. doi:10.1212/wnl.00000000000006875
19. Hahn A, Schain M, Erlandsson M, et al. Modeling Strategies for Quantification of In Vivo (18)F-AV-1451 Binding in Patients with Tau Pathology. *J Nucl Med*. Apr 2017;58(4):623-631. doi:10.2967/jnumed.116.174508



20. Barthélemy NR, Saef B, Li Y, et al. CSF tau phosphorylation occupancies at T217 and T205 represent improved biomarkers of amyloid and tau pathology in Alzheimer's disease. *Nat Aging*. Apr 2023;3(4):391-401. doi:10.1038/s43587-023-00380-7
21. McKhann GM, Knopman DS, Chertkow H, et al. The diagnosis of dementia due to Alzheimer's disease: recommendations from the National Institute on Aging-Alzheimer's Association workgroups on diagnostic guidelines for Alzheimer's disease. *Alzheimers Dement*. May 2011;7(3):263-9. doi:10.1016/j.jalz.2011.03.005
22. Barthélemy NR, Horie K, Sato C, Bateman RJ. Blood plasma phosphorylated-tau isoforms track CNS change in Alzheimer's disease. *J Exp Med*. Nov 2 2020;217(11)doi:10.1084/jem.20200861
23. Janelidze S, Palmqvist S, Leuzy A, et al. Detecting amyloid positivity in early Alzheimer's disease using combinations of plasma A $\beta$ 42/A $\beta$ 40 and p-tau. *Alzheimers Dement*. Feb 2022;18(2):283-293. doi:10.1002/alz.12395
24. Palmqvist S, Janelidze S, Quiroz YT, et al. Discriminative Accuracy of Plasma Phospho-tau217 for Alzheimer Disease vs Other Neurodegenerative Disorders. *Jama*. Aug 25 2020;324(8):772-781. doi:10.1001/jama.2020.12134
25. Mielke MM, Hagen CE, Xu J, et al. Plasma phospho-tau181 increases with Alzheimer's disease clinical severity and is associated with tau- and amyloid-positron emission tomography. *Alzheimers Dement*. Aug 2018;14(8):989-997. doi:10.1016/j.jalz.2018.02.013
26. Doré V, Doecke JD, Saad ZS, et al. Plasma p217+tau versus NAV4694 amyloid and MK6240 tau PET across the Alzheimer's continuum. *Alzheimers Dement (Amst)*. 2022;14(1):e12307. doi:10.1002/dad2.12307
27. Triana-Baltzer G, Moughadam S, Slemmon R, et al. Development and validation of a high-sensitivity assay for measuring p217+tau in plasma. *Alzheimers Dement (Amst)*. 2021;13(1):e12204. doi:10.1002/dad2.12204
28. Ashton NJ, Brum WS, Di Molfetta G, et al. Diagnostic Accuracy of a Plasma Phosphorylated Tau 217 Immunoassay for Alzheimer Disease Pathology. *JAMA Neurol*. Mar 1 2024;81(3):255-263. doi:10.1001/jamaneurol.2023.5319
29. Ibanez L, Liu M, Beric A, et al. Benchmarking of a multi-biomarker low-volume panel for Alzheimer's Disease and related dementia research. *medRxiv*. 2024:2024.06.13.24308895. doi:10.1101/2024.06.13.24308895
30. Hansson O, Batrla R, Brix B, et al. The Alzheimer's Association international guidelines for handling of cerebrospinal fluid for routine clinical measurements of amyloid  $\beta$  and tau. *Alzheimers Dement*. Sep 2021;17(9):1575-1582. doi:10.1002/alz.12316
31. Hansson O, Seibyl J, Stomrud E, et al. CSF biomarkers of Alzheimer's disease concord with amyloid- $\beta$  PET and predict clinical progression: A study of fully automated immunoassays

in BioFINDER and ADNI cohorts. *Alzheimers Dement*. Nov 2018;14(11):1470-1481.  
doi:10.1016/j.jalz.2018.01.010

32. Cicognola C, Janelidze S, Hertze J, et al. Plasma glial fibrillary acidic protein detects Alzheimer pathology and predicts future conversion to Alzheimer dementia in patients with mild cognitive impairment. *Alzheimer's Research & Therapy*. 2021/03/27 2021;13(1):68.  
doi:10.1186/s13195-021-00804-9

33. Brum WS, Cullen NC, Janelidze S, et al. A two-step workflow based on plasma p-tau217 to screen for amyloid  $\beta$  positivity with further confirmatory testing only in uncertain cases. *Nature Aging*. 2023/09/01 2023;3(9):1079-1090. doi:10.1038/s43587-023-00471-5

34. Leuzy A, Smith R, Ossenkoppele R, et al. Diagnostic Performance of RO948 F 18 Tau Positron Emission Tomography in the Differentiation of Alzheimer Disease From Other Neurodegenerative Disorders. *JAMA Neurol*. Aug 1 2020;77(8):955-965.  
doi:10.1001/jamaneurol.2020.0989

35. Cho H, Choi JY, Hwang MS, et al. In vivo cortical spreading pattern of tau and amyloid in the Alzheimer disease spectrum. *Ann Neurol*. Aug 2016;80(2):247-58. doi:10.1002/ana.24711

36. Leuzy A, Smith R, Cullen NC, et al. Biomarker-Based Prediction of Longitudinal Tau Positron Emission Tomography in Alzheimer Disease. *JAMA Neurology*. 2022;79(2):149-158.  
doi:10.1001/jamaneurol.2021.4654

37. Klunk WE, Koeppe RA, Price JC, et al. The Centiloid Project: standardizing quantitative amyloid plaque estimation by PET. *Alzheimers Dement*. Jan 2015;11(1):1-15.e1-4.  
doi:10.1016/j.jalz.2014.07.003

38. Folstein MF, Folstein SE, McHugh PR. "Mini-mental state". A practical method for grading the cognitive state of patients for the clinician. *J Psychiatr Res*. Nov 1975;12(3):189-98.  
doi:10.1016/0022-3956(75)90026-6

39. Borland E, Edgar C, Stomrud E, Cullen N, Hansson O, Palmqvist S. Clinically Relevant Changes for Cognitive Outcomes in Preclinical and Prodromal Cognitive Stages: Implications for Clinical Alzheimer Trials. *Neurology*. Sep 13 2022;99(11):e1142-e1153.  
doi:10.1212/wnl.0000000000200817

40. Salvadó G, Horie K, Barthélemy NR, et al. Disease staging of Alzheimer's disease using a CSF-based biomarker model. *Nature Aging*. 2024/03/21 2024;doi:10.1038/s43587-024-00599-y

41. Therriault J, Woo MS, Salvadó G, et al. Comparison of immunoassay- with mass spectrometry-derived p-tau quantification for the detection of Alzheimer's disease pathology. *Molecular Neurodegeneration*. 2024/01/07 2024;19(1):2. doi:10.1186/s13024-023-00689-2

42. Korecka M, Shaw LM. Mass spectrometry-based methods for robust measurement of Alzheimer's disease biomarkers in biological fluids. *J Neurochem*. Oct 2021;159(2):211-233.  
doi:10.1111/jnc.15465

43. Mielke MM, Frank RD, Dage JL, et al. Comparison of Plasma Phosphorylated Tau Species With Amyloid and Tau Positron Emission Tomography, Neurodegeneration, Vascular Pathology, and Cognitive Outcomes. *JAMA Neurol.* Sep 1 2021;78(9):1108-1117. doi:10.1001/jamaneurol.2021.2293
44. Jack Jr. CR, Andrews JS, Beach TG, et al. Revised criteria for diagnosis and staging of Alzheimer's disease: Alzheimer's Association Workgroup. *Alzheimer's & Dementia.* 2024;1(27)doi:<https://doi.org/10.1002/alz.13859>
45. Pichet Binette A, Janelidze S, Cullen N, et al. Confounding factors of Alzheimer's disease plasma biomarkers and their impact on clinical performance. *Alzheimer's & Dementia.* 2023;19(4):1403-1414. doi:<https://doi.org/10.1002/alz.12787>
46. Palmqvist S, Tideman P, Cullen N, et al. Prediction of future Alzheimer's disease dementia using plasma phospho-tau combined with other accessible measures. *Nat Med.* Jun 2021;27(6):1034-1042. doi:10.1038/s41591-021-01348-z
47. Janelidze S, Barthélemy NR, He Y, Bateman RJ, Hansson O. Mitigating the Associations of Kidney Dysfunction With Blood Biomarkers of Alzheimer Disease by Using Phosphorylated Tau to Total Tau Ratios. *JAMA Neurol.* May 1 2023;80(5):516-522. doi:10.1001/jamaneurol.2023.0199

## Figure legends

**Figure 1 Correlations between plasma p-tau217 biomarkers.** The reported betas are standardized and across the full sample. Z-scores were based on cognitively unimpaired, CSF A $\beta$ - participants ( $n = 364$ ) as the reference group. *Abbreviations:* A $\beta$ , amyloid-beta.

**Figure 2 Comparisons of AUC and accuracy between plasma p-tau217 biomarkers for A $\beta$ -PET and tau-PET status.** Squares represent the AUC or accuracy, and bars represent 95%CI. The dashed line is drawn at CSF p-tau181/A $\beta$ 42<sub>Elcsys</sub> to facilitate comparing the other tests to the current approved FDA-approved test. Significant differences between assays were assessed through bootstrapping and all p-values were FDR-corrected. Models were corrected for age and sex. *Abbreviations:* A $\beta$ , amyloid-beta; CI, confidence interval; FDR, false discovery rate.

**Figure 3 Quantile grouping for A $\beta$ -PET and tau-PET.** Boxes show the interquartile range and the horizontal lines represent the medians. Negative participants were defined as falling below

the pre-defined cut-offs (A $\beta$ -PET: <1.033; tau-PET: <1.362). Neighboring quantiles were compared with Wilcoxon signed-rank tests. \*: p-value < 0.05. \*\*: p-value < 0.01. \*\*\*: p-value < 0.001. *Abbreviations*: A $\beta$ , amyloid-beta.

**Figure 4 R<sup>2</sup> comparisons with A $\beta$ -PET and tau-PET load as outcome.** Squares represent the AUC or accuracy, and bars represent 95%CI. The dashed line is drawn at CSF p-tau181/A $\beta$ 42<sub>Elecsys</sub>, to facilitate comparing the other tests to the current approved FDA-approved test. Significant differences between assays were assessed through bootstrapping and all p-values were FDR-corrected. Cross-sectional: PET SUVR ~ biomarker + age + sex. Longitudinal: individual rate of change in PET SUVR ~ biomarker + age + sex. *Abbreviations*: A $\beta$ , amyloid-beta; CI, confidence interval; FDR, false discovery rate.

**Figure 5 R<sup>2</sup> comparisons with cognition as outcome.** Squares represent the AUC or accuracy, and bars represent 95%CI. The dashed line is drawn at CSF p-tau181/A $\beta$ 42<sub>Elecsys</sub>, to facilitate comparing the other tests to the current approved FDA-approved test. Significant differences between assays were assessed through bootstrapping and all p-values were FDR-corrected. For the MMSE models, participants with non-AD dementia were excluded. For the mPACC models, participants with dementia were excluded. Cross-sectional: cognition ~ biomarker + age + sex + education. Longitudinal: individual rate of change in cognition ~ biomarker + age + sex + education. *Abbreviations*: A $\beta$ , amyloid-beta; CI, confidence interval; FDR, false discovery rate.

**Figure 6 Replication in the Knight ADRC cohort.** Dots and squares represent the AUC, accuracy or R<sup>2</sup>, and bars represent 95%CI. The dashed line is drawn at CSF p-tau181/A $\beta$ 42<sub>Lumipulse</sub>, to facilitate comparing the other tests to the current approved FDA-approved test. The global cognitive composite was a composite of several cognitive tests, z-scored with CU A $\beta$ - individuals as reference group. Significant differences between assays were assessed through bootstrapping and all p-values were FDR-corrected. Linear model A $\beta$ -PET: A $\beta$ -PET ~ biomarker + age + sex. Linear model global cognitive composite: cognition ~ biomarker + age + sex + education. *Abbreviations*: A $\beta$ , amyloid-beta; CI, confidence interval; CU, cognitively unimpaired; FDR, false discovery rate.

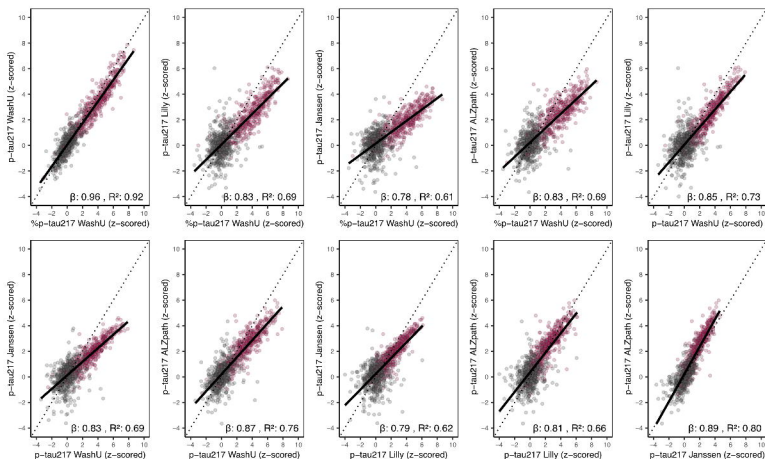

**Figure 1** Correlations between plasma p-tau217 biomarkers. The reported betas are standardized and across the full sample. Z-scores were based on cognitively unimpaired, CSF A $\beta$ -participants ( $n = 364$ ) as the reference group. *Abbreviations:* A $\beta$ , amyloid-beta.

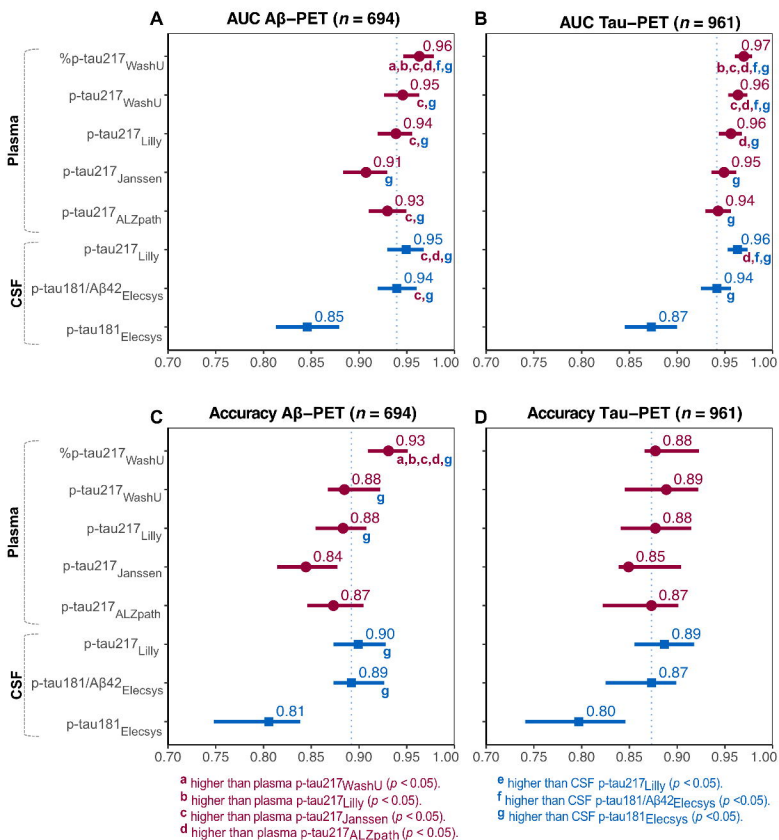

**Figure 2 Comparisons of AUC and accuracy between plasma p-tau217 biomarkers for Aβ-PET and tau-PET status.** Squares represent the AUC or accuracy, and bars represent 95%CI. The dashed line is drawn at CSF p-tau181/Aβ42<sub>Elcysys</sub> to facilitate comparing the other tests to the current approved FDA-approved test. Significant differences between assays were assessed through bootstrapping and all p-values were FDR-corrected. Models were corrected for age and sex. *Abbreviations:* Aβ, amyloid-beta; CI, confidence interval; FDR, false discovery rate.

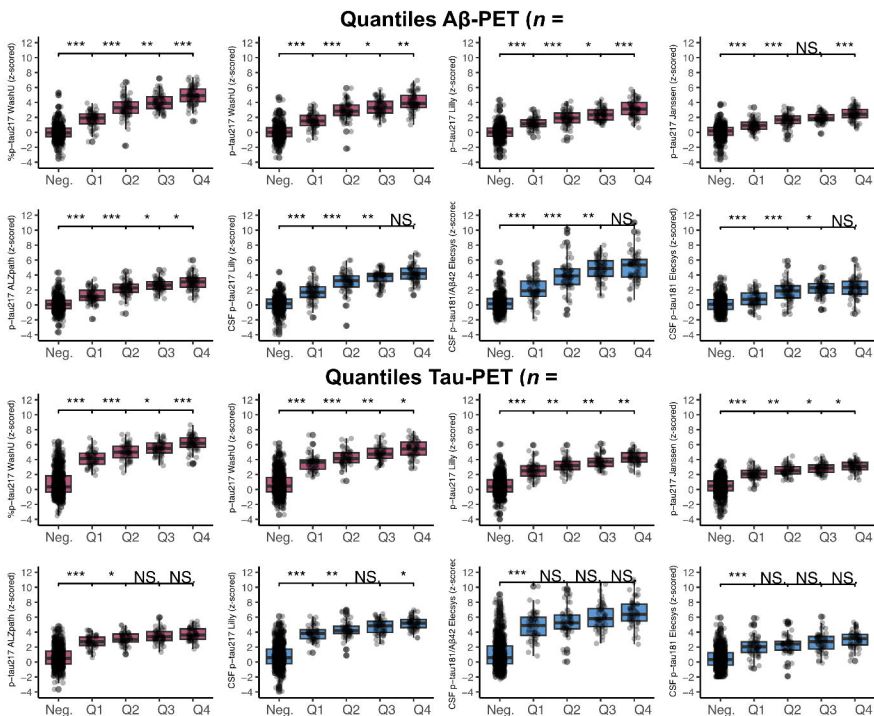

**Figure 3** Quantile grouping for A $\beta$ -PET and tau-PET. Boxes show the interquartile range and the horizontal lines represent the medians. Negative participants were defined as falling below the pre-defined cut-offs (A $\beta$ -PET: <1.033; tau-PET: <1.362). Neighboring quantiles were compared with Wilcoxon signed-rank tests. \*: p-value < 0.05. \*\*: p-value < 0.01. \*\*\*: p-value < 0.001. *Abbreviations:* A $\beta$ , amyloid-beta.

## Baseline load

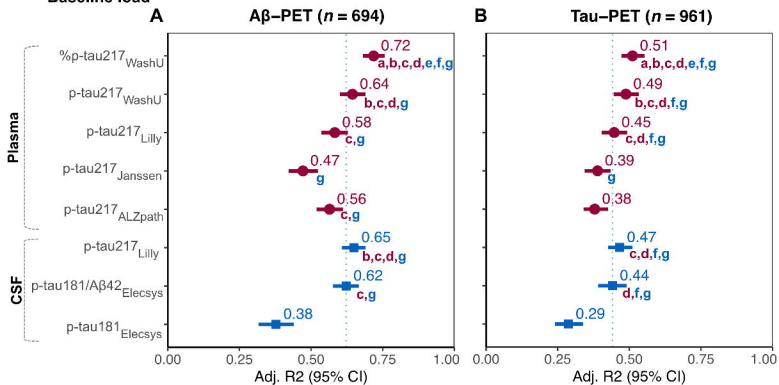

## Rate of change

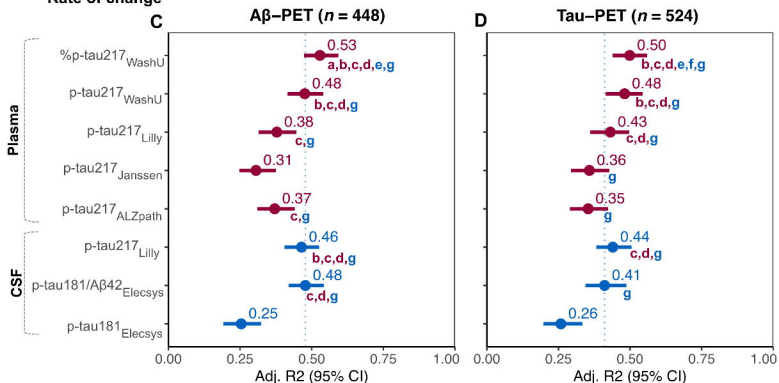

- a higher than plasma p-tau217<sub>WashU</sub> ( $p < 0.05$ ).
- b higher than plasma p-tau217<sub>Lilly</sub> ( $p < 0.05$ ).
- c higher than plasma p-tau217<sub>Janssen</sub> ( $p < 0.05$ ).
- d higher than plasma p-tau217<sub>ALZpath</sub> ( $p < 0.05$ ).

- e higher than CSF p-tau217<sub>Lilly</sub> ( $p < 0.05$ ).
- f higher than CSF p-tau181/Aβ42<sub>Elecsys</sub> ( $p < 0.05$ ).
- g higher than CSF p-tau181<sub>Elecsys</sub> ( $p < 0.05$ ).

**Figure 4** R<sup>2</sup> comparisons with  $A\beta$ -PET and tau-PET load as outcome. Squares represent the AUC or accuracy, and bars represent 95%CI. The dashed line is drawn at CSF p-tau181/Aβ42<sub>Elecsys</sub> to facilitate comparing the other tests to the current approved FDA-approved test. Significant differences between assays were assessed through bootstrapping and all p-values were FDR-corrected. Cross-sectional: PET SUVR ~ biomarker + age + sex. Longitudinal: individual rate of change in PET SUVR ~ biomarker + age + sex. *Abbreviations:* Aβ, amyloid-beta; CI, confidence interval; FDR, false discovery rate.



## Baseline cognition

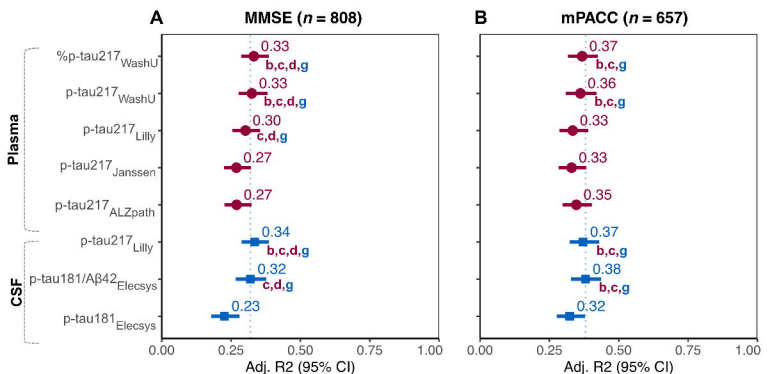

## Rate of change cognition

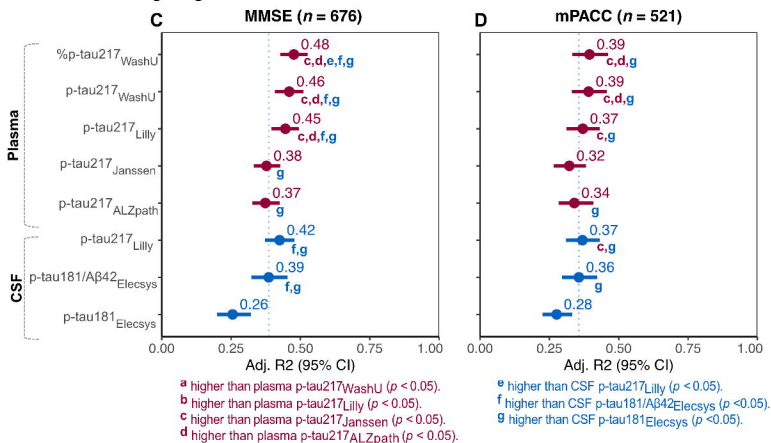

**Figure 5 R<sup>2</sup> comparisons with cognition as outcome.** Squares represent the AUC or accuracy, and bars represent 95%CI. The dashed line is drawn at CSF p-tau181/Aβ42<sub>Elecsys</sub>, to facilitate comparing the other tests to the current approved FDA-approved test. Significant differences between assays were assessed through bootstrapping and all p-values were FDR-corrected. For the MMSE models, participants with non-AD dementia were excluded. For the mPACC models, participants with dementia were excluded. Cross-sectional: cognition ~ biomarker + age + sex + education. Longitudinal: individual rate of change in cognition ~ biomarker + age + sex + education. *Abbreviations:* Aβ, amyloid-beta; CI, confidence interval; FDR, false discovery rate.

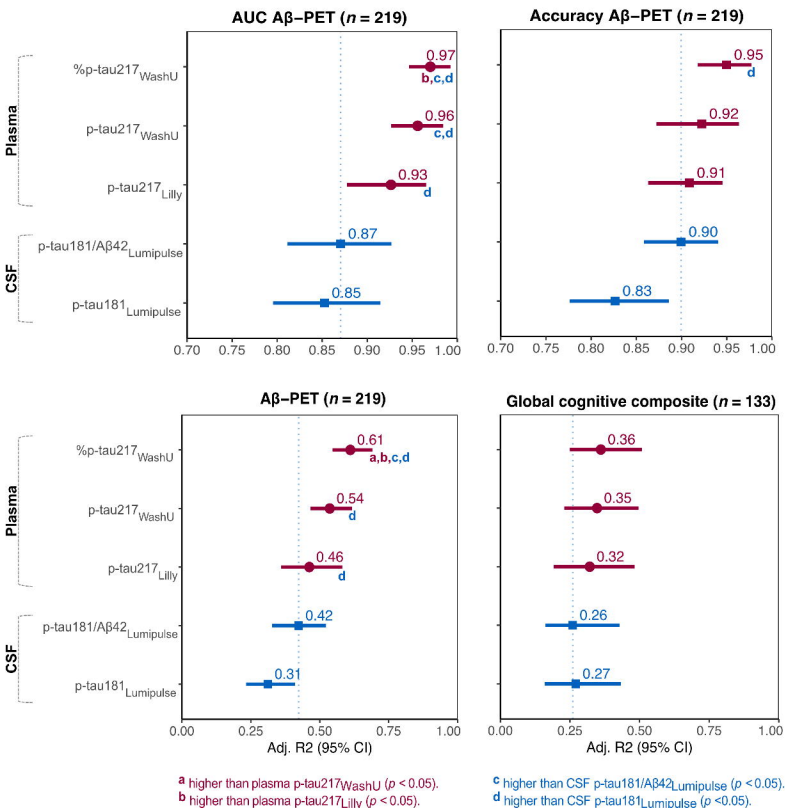

**Figure 6 Replication in the Knight ADRC cohort.** Dots and squares represent the AUC, accuracy or R2, and bars represent 95%CI. The dashed line is drawn at CSF p-tau181/Aβ42<sub>Lumipulse</sub> to facilitate comparing the other tests to the current approved FDA-approved test. The global cognitive composite was a composite of several cognitive tests, z-scored with CU Aβ<sup>-</sup> individuals as reference group. Significant differences between assays were assessed through bootstrapping and all p-values were FDR-corrected. Linear model Aβ-PET: Aβ-PET ~ biomarker + age + sex. Linear model global cognitive composite: cognition ~ biomarker + age + sex + education. *Abbreviations:* Aβ, amyloid-beta; CI, confidence interval; CU, cognitively unimpaired; FDR, false discovery rate.
